# Supplementary material for: Evaluation of Hyperparameter Optimization in Machine and Deep Learning Methods for Decoding Imagined Speech EEG
Source: PubMed Central journal article supplement (PMC7472624; doi:10.3390/s20164629), 2020-08-17
Supplement: sensors-20-04629-s001.pdf [file sensors-20-04629-s001.pdf]

Article

# Evaluation of Hyperparameter Optimization in Machine and Deep Learning Methods for Decoding Imagined Speech EEG

Ciaran Cooney <sup>1,\*</sup>, Attila Korik <sup>1</sup>, Raffaella Folli <sup>2</sup> and Damien Coyle <sup>1</sup>

<sup>1</sup> Intelligent Systems Research Centre, Ulster University, Londonderry BT48 7JL, UK; korik-a@ulster.ac.uk (A.K.); dh.coyle@ulster.ac.uk (D.C.)

<sup>2</sup> Institute for Research in Social Sciences, Ulster University, Jordanstown BT37 0QB, UK; r.folli@ulster.ac.uk

\* Correspondence: cooney-c@ulster.ac.uk

Received: 10 June 2020; Accepted: 13 August 2020; Published: date

## Supplementary

**Table 1 S1.** Number of trainable parameters per CNN per dataset.

|                      | Shallow CNN |        | Deep CNN |        | EEGNet |        |
|----------------------|-------------|--------|----------|--------|--------|--------|
|                      | Words       | Vowels | Words    | Vowels | Words  | Vowels |
| Trainable parameters | 49562       | 48245  | 268481   | 268260 | 5990   | 5477   |

**Table 2 S2.** Inner-fold validation accuracies for number of epochs.

|    | Shallow CNN |        | Deep CNN |        | EEGNet |        |
|----|-------------|--------|----------|--------|--------|--------|
|    | Words       | Vowels | Words    | Vowels | Words  | Vowels |
| 20 | 37.22       | 41.80  | 27.88    | 32.70  | 25.29  | 29.33  |
| 40 | 51.69       | 56.59  | 38.49    | 44.55  | 26.40  | 30.46  |
| 60 | 53.43       | 58.26  | 41.06    | 47.01  | 26.45  | 30.54  |
| 80 | 53.43       | 58.31  | 41.10    | 47.12  | 26.51  | 30.57  |

**Table S3.** Average precision scores for the benchmark and CNN classifiers trained on imagined words.

|          | Benchmark Methods |       |       |       |       |       | CNN Methods |       |       |       |        |       |
|----------|-------------------|-------|-------|-------|-------|-------|-------------|-------|-------|-------|--------|-------|
|          | SVM               |       | RdF   |       | rLDA  |       | Shallow     |       | Deep  |       | EEGNet |       |
|          | Intra             | Inter | Intra | Inter | Intra | Inter | Intra       | Inter | Intra | Inter | Intra  | Inter |
| Accuracy | 18.85             | 18.42 | 18.33 | 18.70 | 20.85 | 20.97 | 24.91       | 24.29 | 24.45 | 24.86 | 24.46  | 24.88 |
| Std.     | 2.85              | 2.44  | 2.82  | 3.17  | 2.68  | 2.14  | 1.56        | 1.95  | 1.89  | 1.79  | 1.72   | 0.92  |
| Max.     | 23.81             | 23.76 | 22.61 | 23.40 | 24.10 | 25.04 | 27.39       | 28.26 | 30.30 | 28.32 | 28.35  | 26.51 |

**Table S4.** Average precision scores for the benchmark and CNN classifiers trained on imagined vowels.

|          | Benchmark Methods |       |       |       |       |       | CNN Methods |       |       |       |        |       |
|----------|-------------------|-------|-------|-------|-------|-------|-------------|-------|-------|-------|--------|-------|
|          | SVM               |       | RdF   |       | rLDA  |       | Shallow     |       | Deep  |       | EEGNet |       |
|          | Intra             | Inter | Intra | Inter | Intra | Inter | Intra       | Inter | Intra | Inter | Intra  | Inter |
| Accuracy | 22.20             | 22.26 | 23.13 | 23.25 | 25.75 | 26.16 | 29.67       | 29.37 | 29.09 | 29.62 | 30.04  | 30.19 |
| Std.     | 2.97              | 3.35  | 3.89  | 4.10  | 3.11  | 2.33  | 3.42        | 2.51  | 2.54  | 1.77  | 2.67   | 2.71  |
| Max.     | 26.76             | 27.15 | 30.13 | 29.24 | 31.71 | 29.73 | 35.85       | 33.37 | 33.24 | 32.47 | 32.31  | 35.15 |
